# Supplementary material for: Astaxanthin Protects against Hyperglycemia-Induced Oxidative and Inflammatory Damage to Bone Marrow and to Bone Marrow-Retained Stem Cells and Restores Normal Hematopoiesis in Streptozotocin-Induced Diabetic Mice
Source: MDPI journal article supplement (doi:10.3390/antiox11122321), 2022-11-23
Supplement: s1 [file s1]

## Supporting Information

**Table S1.** Sequences of primers used for qRT-PCR.

| <b>Genes</b>     | <b>Forward Primers</b>     | <b>Reverse Primers</b>    | <b>NCBI Reference<br/>Sequence Number</b> |
|------------------|----------------------------|---------------------------|-------------------------------------------|
| <i>Ang1</i>      | cagcacgaaggatgctgataac     | ttgtcccgcagtgtagaacatt    | NM_001286062.1                            |
| <i>β-Catenin</i> | ccgttcgccttcattatgga       | ggcaaggtttcgaatcaatcc     | NM_001165902.1                            |
| <i>DKK1</i>      | caaaaatgtatcacaccaaaggacaa | tgttgggtacacacttgaccttctt | NM_010051.3                               |
| <i>CXCR4</i>     | cctgcccggcatcgatcc         | tgcgcttctggtggcccttg      | NM_009911.3                               |
| <i>SDF-1</i>     | tggggcctctgggcacagtt       | aagccctgcaagcgttctcg      | NM_001012477                              |
| <i>NFATc1</i>    | ggtgccttttgcgagcagtatc     | cgtatggaccagaatgtgacgg    | NM_001164109.1                            |
| <i>TRAP</i>      | gatgactttgccagtcagca       | acatagcccacaccgttctc      | NM_007388.3                               |
| <i>CTSK</i>      | ggccaactcaagaagaaaac       | gtgcttgcttccttctgg        | NM_007802.4                               |
| <i>GAPDH</i>     | gacggccgcattcttcttg        | cacaccgaccttcacat         | XM_017321385.1                            |

## Supplemental figures and legends

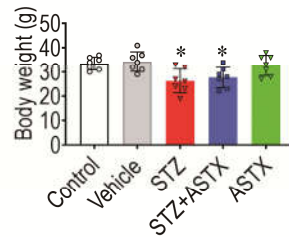

**Figure S1.** Supplemental ASTX does not ameliorate STZ-induced loss of body weight in STZ-injected mice. Body weight in mice groups were measured 60 days after hyperglycemia induction ( $n = 7$ ). \* $p < 0.05$  by unpaired Student  $t$ -test.

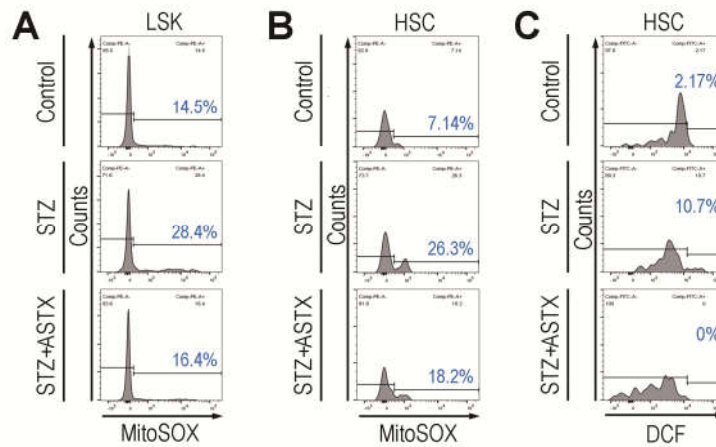

**Figure S2.** Supplemental ASTX suppresses hyperglycemia-induced oxidative stress in BM-derived LSK cells and HSCs of STZ-injected mice. **(A,B)** MitoSox- or **(C)** DCF-specific mean intensities in BM-derived LSK cells and HSCs of mice groups were determined by flow cytometry at 60 days post-hyperglycemia induction. A representative result from five different samples is shown.

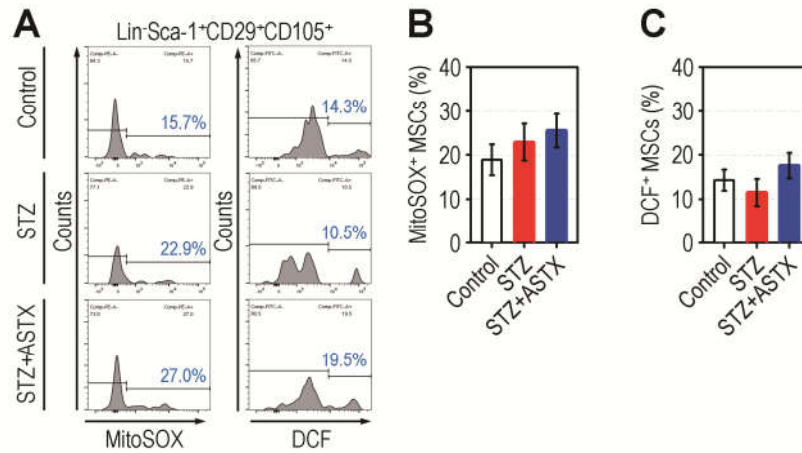

**Figure S3.** STZ injection or in combination with ASTX does not increase levels of BM MSCs positive to MitoSox or DCF in mice. **(A)** Flow cytometric analysis exhibiting the MitoSox- or DCF-specific mean intensities in BM-derived MSCs of mice groups at 60 days post-hyperglycemia induction. The percentages of **(B)** MitoSox<sup>+</sup> and **(C)** DCF<sup>+</sup> MSCs were calculated ( $n = 5$ ).
